# Supplementary material
Source: PubMed Central journal article supplement (PMC3518109)
Supplement: supp_M112.019778_mcp.M112.019778-2.pdf [file supp_M112.019778_mcp.M112.019778-2.pdf]

|      |        |      |                                                               |          |         |        |    |      |       |
|------|--------|------|---------------------------------------------------------------|----------|---------|--------|----|------|-------|
| 886a | 32,708 | 5.39 | <b>β5-Tubulin*</b>                                            | 135469   | 49,972  | 4.79   | 15 | 30%  | MALDI |
| 886b |        |      | Guanine nucleotide-binding protein G(I)/G(S)/G(T) subunit β-1 | 6680045  | 38,165  | 5.6    | 2  |      | ESI   |
| 886c |        |      | <b>β6-Tubulin</b>                                             | 27754056 | 31,015  | 4.8    | 2  |      | ESI   |
| 999a | 26,452 | 5.2  | <b>Actin</b>                                                  | various  | ~40,000 | ~5-5.5 | 22 | ~35% | MALDI |
| 999b |        |      | Prohibitin                                                    | 6679299  | 29,820  | 5.57   | 6  | 25%  | MALDI |

**Table S1** Mass spectrometric identification of differentially regulated proteins in response to GF treatment of Swiss 3T3 cells. The table shows the database spot IDs, gel-based molecular weights and pIs, protein names, NCBI accession numbers, predicted mass and pI, number of peptides identified, coverage (from MALDI data) and method of identification for the identified proteins. All proteins are listed where spots contained multiple proteins. \* denotes the rat or human sequence bearing high homology to the mouse sequence. Only significant hits as determined by Mascot are considered as positive identifications and using the selection criteria outlined in materials and Methods. Relative synthesis at 18 hours (to PDGF at 18 hrs) is shown for some of the protein isoforms. Values were calculated from autoradiograms using ChiMAP and are averages from three independent experiments; they range between -100% and +100% (complete absence/presence versus reference) with zero representing no change.
